# Supplementary material
Source: Springer Nature journal article supplement (https://springermedizin.de/resource/supplementary/13063_2010_647_MOESM6_ESM.pdf/9618404)

- HTA short follow up (n=85 comparisons)
- HTA short term follow up with 2 comparisons for 12 comparison trial (n=75)
- HTA long term follow up (n=85 comparisons)
- HTA long term follow up with 2 comparisons for 12 comparison trial (n=75)
- NCI Trials reviewed by Djulbegovic et al (n=654 comparisons)

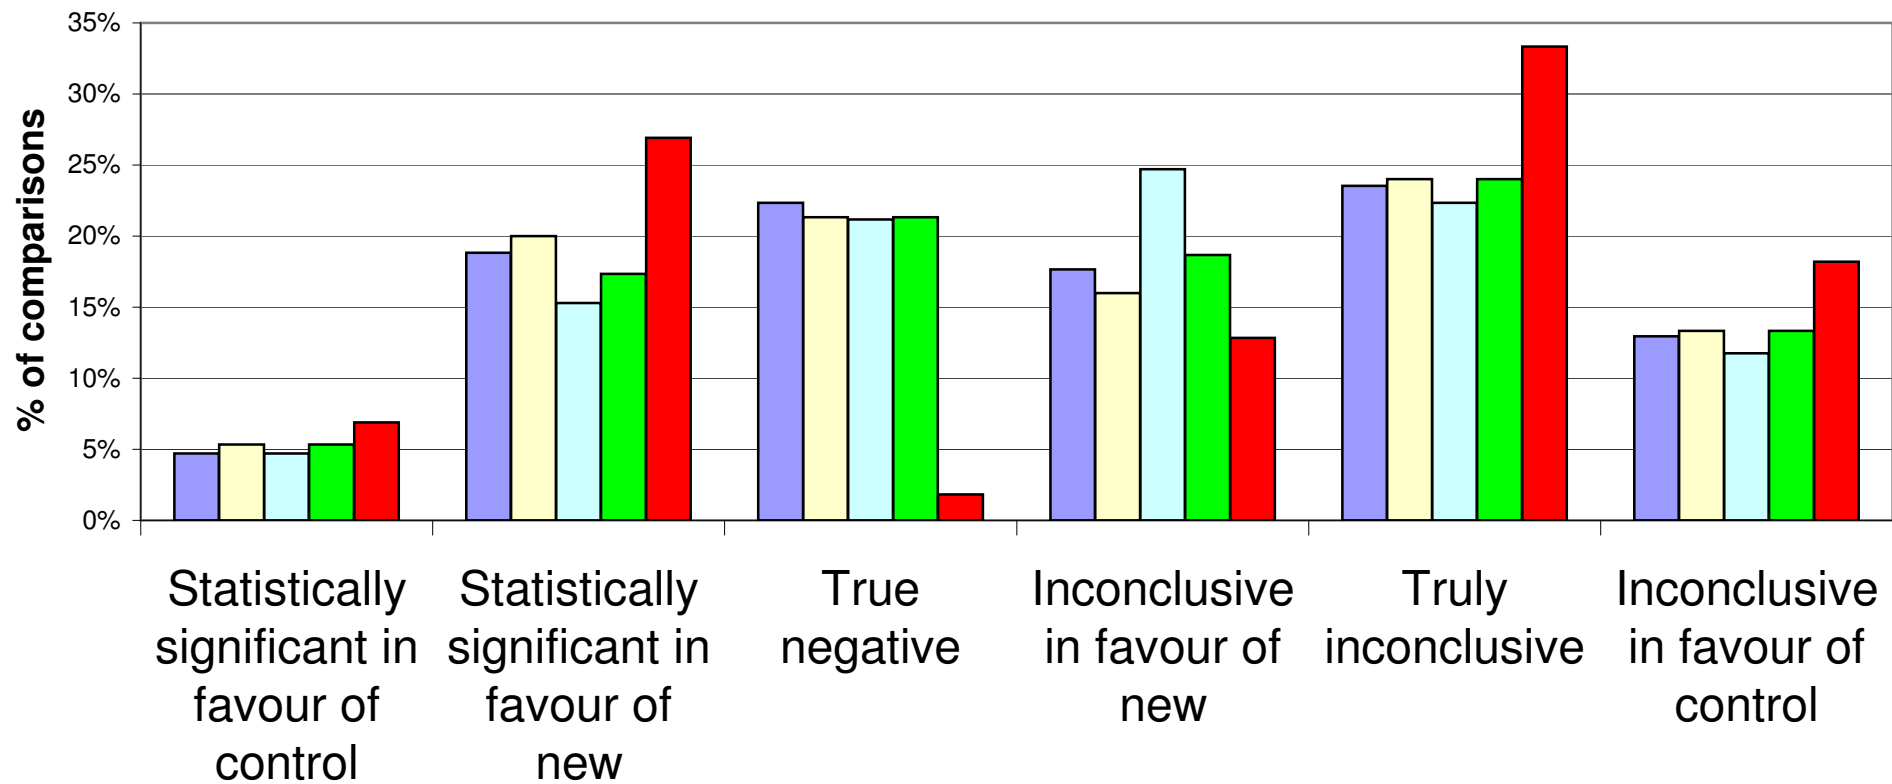

Supplement: MOESM6 [file 9618404]
